# Supplementary material for: Fluid resuscitation-related coagulation impairment in a porcine hemorrhagic shock model
Source: PeerJ. 2020 Feb 10;8:e8399. doi: 10.7717/peerj.8399 (PMC7017792; doi:10.7717/peerj.8399)
Supplement: Data S1 [file peerj-08-8399-s001.xlsx]

## Sheet: Table for Rotem
		EXTEM			INTEM			FIBTEM			APTEM
Parameter		BLH	0h	4h	BLH	0h	4h	BLH	0h	4h	BLH	0h	4h
MEAN (SD)
CT	HES	47 (10)	80 (33)	53 (19)	207 (38)	199 (44)	229 (100)	52 (5)	181 (165)	65 (6)	49 (5)	73 (17)	58 (9)
[%]	GP	53 (21)	64 (14)	56 (10)	171 (24)	179 (43)	186 (38)	63 (24)	81 (62)	65 (14)	52 (10)	58 (10)	51 (7)
	BEL	50 (7)	50 (4)	53 (2)	153 (27)	152 (36)	176 (50)	54 (9)	53 (3)	52 (6)	49 (8)	55 (18)	48 (3)
	Controll
CFT	HES	49 (18)	108 (15)	64 (16)	45 (7)	98 (16)	62 (21)	83 (35)	-	332 (19)	39 (4)	116 (23)	62 (9)
[%]	GP	38 (5)	77 (7)	61 (17)	39 (8)	62 (11)	53 (9)	100 (85)	-	326 (195)	39 (5)	78 (14)	61 (12)
	BEL	36 (7)	55 (14)	45 (9)	47 (24)	44 (14)	46 (28)	80 (60)	282 (154)	213 (157)	36 (9)	54 (9)	75 (100)
	Controll
alpha -angle	HES	80 (3)	70 (5)	78 (4)	81 (1)	70 (3)	77 (4)	79 (3)	49 (45)	58 (5)	82 (1)	67 (4)	77 (2)
[%]	GP	82 (3)	74 (2)	78 (3)	82 (1)	77 (2)	79 (2)	79 (6)	47 (20)	68 (7)	83 (2)	74 (3)	78 (2)
	BEL	83 (2)	79 (3)	81 (2)	81 (3)	81 (3)	81 (5)	81 (4)	68 (10)	76 (10)	83 (2)	79 (2)	81 (2)
	Controll
A10	HES	69 (4)	49 (3)	60 (6)	68 (2)	46 (3)	60 (3)	52 (5)	181 (165)	65 (6)	71 (3)	48 (4)	62 (3)
[%]	GP	73 (3)	55 (4)	61 (3)	71 (2)	55 (3)	61 (3)	63 (24)	81 (62)	65 (14)	69 (8)	54 (3)	63 (6)
	BEL	74 (5)	65 (7)	69 (6)	70 (8)	65 (6)	69 (6)	54 (9)	53 (3)	52 (6)	74 (5)	65 (4)	65 (18)
	Controll
A20	HES	72 (4)	53 (4)	64 (5)	69 (2)	49 (3)	61 (3)	39 (8)	12 (9)	18 (5)	73 (2)	53 (4)	66 (3)
[%]	GP	74 (3)	58 (3)	63 (4)	72 (2)	58 (3)	63 (3)	38 (11)	15 (6)	26 (7)	71 (9)	58 (3)	66 (5)
	BEL	76 (5)	68 (6)	72 (5)	71 (9)	67 (6)	70 (5)	44 (13)	25 (7)	36 (21)	76 (5)	68 (4)	67 (18)
	Controll
MCF	HES	71 (4)	52 (6)	64 (5)	69 (2)	49 (4)	62 (3)	40 (8)	13 (9)	19 (6)	73 (2)	53 (4)	66 (3)
[%]	GP	74 (3)	58 (4)	63 (4)	72 (2)	58 (3)	63 (3)	39 (11)	14 (7)	25 (8)	71 (9)	58 (3)	66 (5)
	BEL	76 (5)	68 (6)	71 (5)	72 (9)	65 (8)	69 (7)	45 (13)	24 (6)	36 (21)	76 (5)	67 (6)	68 (18)
	Controll
ML	HES	11 (4)	12 (5)	11 (6)	15 (4)	16 (4)	17 (4)	14 (4)	19 (22)	15 (13)	10 (4)	13 (5)	10 (5)
[%]	GP	11 (3)	13 (5)	11 (6)	16 (2)	17 (4)	18 (3)	10 (5)	34 (36)	15 (6)	10 (3)	13 (4)	12 (3)
	BEL	22 (4)	10 (4)	13 (3)	17 (5)	14 (4)	17 (5)	21 (4)	9 (6)	21 (34)	22 (3)	8 (4)	23 (34)
	Controll
crSO2= cerebral regional oxygen saturation; SO2S = superficial oxygen saturation; SO2D = deep oxygen saturation; FlowS= superficial bloodflow; FlowD = deep bloodflow; HbS= superficial hemoglobin content; HbD= deep hemoglobin content; VS = superficial velocity; VD= deep velocity

## Sheet: RAW DATA ROTEM
Tier-ID	Messzeitpunkt	EXTEM							Intem							Fibtem							Aptem
		CT	CFT	Alpha	A10	A20	MCF	ML	CT	CFT	Alpha	A10	A20	MCF	ML	CT	CFT	Alpha	A10	A20	MCF	ML	CT	CFT	Alpha	A10	A20	MCF	ML
ARDS51-01	BLH	51	31	84	76	78	78	8	151	28	84	76	77	77	13	26	6	89	64	65	65	1	50	33	83	74	76	76	10
	T0	-	-	-	-	-	-	-	-	-	-	-	-	-	-	-	-	-	-	-	-	-	-	-	-	-	-	-	-
	T4	-	-	-	-	-	-	-	-	-	-	-	-	-	-	-	-	-	-	-	-	-	-	-	-	-	-	-	-
ARDS51-02	BLH	54	48	80	66	69	69	16	159	38	82	68	69	70	20	55	40	82	51	53	53	6	53	37	82	71	73	73	15
	T0	14	100	79	52	57	57	15	163	77	74	50	52	52	22	30	51	82	29	31	31	0	50	103	69	52	56	56	16
	T4	14	38	86	49	55	55	2
ARDS51-03	BLH	51	38	82	69	70	70	13	202	45	81	69	70	70	16	116	267		31	36	37	7	45	33	83	70	71	71	12
	T0	67	67	76	53	55	55	6	122	57	78	54	56	56	9	70	535	42	21	22	22	5	65	68	76	53	56	56	5
	T4	61	55	79	61	63	63	15	143	45	81	59	60	60	19	62	139	69	69	36	40	7	53	60	78	60	63	63	15
ARDS51-04	BLH	51	34	83	75	76	76	11	161	55	79	57	56	57	21	62	52	79	55	56	56	8	52	33	84	74	74	75	12
	T0	53	45	81	66	68	68	11	160	36	83	66	68	53	13	55	146	73	32	32	23	18	53	51	80	63	66	66	12
	T4	52	44	81	72	74	74	11	143	34	83	70	72	72	15	43	38	83	75	77	77	9	48	305	76	24	26	27	2
ARDS51-05	BLH	52	42	82	71	72	72	15	169	39	82	69	70	70	20	57	128	78	35	36	36	15	52	43	81	70	72	72	15
	T0	61	81	73	53	57	57	21	230	70	76	52	55	55	22	129	-	-	8	9	9	27	66	89	72	51	55	55	19
	T4	53	76	75	57	60	60	16	152	55	79	57	58	59	20	71	-	-	17	18	18	22	53	75	75	58	61	61	16
ARDS51-06	BLH	77	41	82	74	75	75	9	183	37	83	72	73	73	13	59	64	81	39	40	40	8	51	37	83	74	76	76	7
	T0	68	73	75	58	61	61	14	226	64	77	55	59	58	18	57		56	17	18	18	8	65	66	76	57	60	61	13
	T4	69	64	77	62	66	66	15	223	55	79	59	61	61	19	67	-	61	19	19	19	18	54	68	77	63	66	66	14
ARDS51-07	BLH	348	80	75	65	68	68	14	130	31	84	71	71	71	14	57	117	75	32	32	33	14	51	38	82	72	73	73	9
	T0	89	104	69	47	51	51	6	195	92	71	45	48	47	10	130	-	-	13	15	15	7	93	97	70	47	50	51	6
	T4	61	60	78	64	67	67	11	177	46	81	63	64	64	15	70	-	61	17	18	19	11	60	57	78	63	66	66	10
ARDS51-08	BLH	50	36	83	73	74	74	10	246	51	80	68	70	70	14	50	74	80	35	34	36	10	45	36	83	73	75	75	7
	T0	94	104	69	51	56	57	11	214	88	72	49	53	53	16	535	-	-	3	3	3	2	91	110	68	50	55	55	10
	T4	71	75	75	63	67	67	9	287	65	77	59	63	63	14	72	-	48	11	12	12	0	73	71	76	61	66	66	8
ARDS51-09	BLH	52	45	81	67	68	68	12	148	39	82	66	66	67	19	57	135	76	31	31	31	15	47	44	81	67	69	69	15
	T0	70	109	68	47	50	50	18	174	97	71	44	45	45	20	101	-	-	11	11	11	23	51	135	64	45	48	48	19
	T4	61	82	73	56	60	60	17	152	62	77	55	56	56	21	64	-	-	9	11	11	4	49	75	75	58	62	62	7
ARDS51-10	BLH	77	30	84	74	75	75	12	151	34	83	71	70	71	16	58	69	79	39	39	40	12	48	38	83	71	71	72	11
	T0	44	82	73	54	58	58	13	139	63	77	54	56	56	19	76	-	-	13	13	14	26	68	71	76	53	56	56	15
	T4	52	60	78	62	65	65	12	185	45	81	63	64	65	18	65	534	-	20	21	21	21	56	59	78	60	63	63	13
ARDS51-11	BLH	43	37	82	70	71	71	16	161	32	83	70	70	70	20	46	68	81	43	44	45	16	40	37	83	71	73	72	16
	T0	86	103	69	48	51	51	20								173	-	-	8	8	8	29	78	111	68	47	51	51	19
	T4	54	62	78	63	65	65	18	171	47	80	61	60	61	21	67	364	55	23	23	23	24	57	58	78	63	65	65	18
ARDS51-12	BLH	52	30	84	78	79	79	8	180	29	84	76	76	77	13	43	26	85	55	56	56	2	75	34	85	50	51	51	8
	T0	52	69	76	62	62	65	12	166	40	82	60	63	63	17	32	-	62	18	18	19	15	47	69	76	60	64	64	12
	T4	40	27	85	57	57	57	0	193	48	80	66	67	67	19	45	188	74	27	28	28	16	38	40	82	74	76	76	11
ARDS51-13	BLH	47	35	83	76	78	78	4	181	39	83	73	74	74	10	47	53	81	44	44	45	12	56	34	83	75	76	76	6
	T0	83	90	72	54	58	59	9	279	102	69	47	50	51	13	268	-	18	7	7	11	63	70	91	72	54	59	59	9
	T4	59	53	79	65	69	69	6	403	102	70	59	62	62	13	56	391	57	22	21	23	31	53	54	79	66	69	69	6
ARDS51-14	BLH	50	41	82	68	70	70	14	196	36	82	65	67	67	20	56	114	81	34	36	36	12	50	45	81	67	69	69	14
	T0	45	68	76	58	62	62	16	220	70	76	55	58	59	21	50	223	68	30	36	36	3	92	69	76	60	65	65	12
	T4	55	52	79	61	65	65	17	288	110	70	56	61	61	23	46	384	54	22	23	23	18	49	45	81	64	67	67	16
ARDS51-15	BLH	51	38	82	73	75	75	8	170	54	80	70	71	71	15	54	85	79	38	41	42	8	49	42	81	71	74	74	9
	T0	66	84	73	54	58	59	11	138	72	75	56	59	59	16	23		17	12	14	4	100	50	84	73	55	59	59	12
	T4	64	63	77	65	69	69	7	239	69	76	62	65	65	13	89	455	-	23	32	23	20	55	65	77	64	68	68	7
ARDS51-16	BLH	52	38	83	76	78	78	16	232	43	82	72	73	73	24	53	54	84	39	41	41	3	51	40	82	76	78	78	16
	T0	44	38	83	76	78	78	13	147	34	83	75	76	76	19	48	110	77	34	37	38	9	42	37	83	75	77	77	13
	T4	-	-	-	-	-	-	-	-	-	-	-	-	-	-	-	-	-	-	-	-	-	-	-	-	-	-	-	-
ARDS51-17	BLH	51	40	82	74	77	77	8	126	166	81	68	71	8	100	66	200	74	27	27	28	13	54	40	82	75	77	77	8
	T0	51	56	79	66	70	70	5	122	35	83	67	69	69	11	57	-	46	16	18	18	13	46	50	80	68	71	72	4
	T4	52	48	80	70	73	73	8	161	39	82	70	71	58	8	54	411	75	21	21	22	10	41	45	81	72	75	75	7
ARDS51-18	BLH	47	55	79	65	66	67	15	196	43	81	67	66	68	18	45	105	79	33	35	35	13	41	50	80	67	68	69	15
	T0	-	-	-	-	-	-	-	-	-	-	-	-	-	-	-	-	-	-	-	-	-	-	-	-	-	-	-	-
	T4	-	-	-	-	-	-	-	-	-	-	-	-	-	-	-	-	-	-	-	-	-	-	-	-	-	-	-	-
ARDS51-19	BLH	42	40	82	76	78	78	9	135	90	77	74	76	76	13	42	67	80	42	46	47	3	38	40	82	74	76	76	9
	T0	52	55	79	63	66	66	12	142	38	82	66	68	69	17	51		67	18	18	19	12	45	56	79	66	67	57	6
	T4	52	41	82	70	72	72	13	200	37	83	70	71	71	17	52	268	77	24	26	26	7	48	39	82	71	73	73	15
ARDS51-20	BLH
	T0
	T4
ARDS51-21	BLH	51	41	82	73	73	73	16	313	68	77	67	66	68	25	55	116	76	35	35	35	19	44	37	82	73	73	74	16
	T0	49	44	81	71	72	72	15	898	285	46	40	48	56	37	45	143	73	31	31	32	19	41	43	81	69	70	70	15
	T4
ARDS51-22	BLH	49	21	86	83	84	84	12	131	22	86	81	81	81	18	54	21	86	64	65	65	6	40	18	86	84	85	85	11
	T0	48	30	84	79	80	80	11
	T4	52	27	85	79	80	80	14	152	27	85	76	76	77	19	58	35	84	52	53	53	8	48	29	84	78	79	82	18
ARDS51-23	BLH	46	35	83	77	79	79	5	142	31	84	78	79	79	10	46	47	82	50	53	53	9	54	36	83	77	79	79	7
	T0	49	43	81	71	74	74	6	139	36	83	72	74	74	11	52	274	74	24	24	24	8	45	42	82	71	74	75	6
	T4	-	-	-	-	-	-	-	161	34	83	73	74	74	100	53	154	78	25	25	26	100	46	41	82	74	76	77	100
ARDS51-24	BLH	13	86	76	71	74	74	8	128	35	83	72	72	73	16	66	nan	68	16	17	17	15	45	46	81	74	77	77	8
	T0	89	95	72	48	52	53	15	176	67	77	52	56	57	21	202			5	4	8	70	44	105	69	51	55	55	13
	T4
ARDS51-25	BLH	27	68	78	68	72	71	11	146	35	83	68	68	69	15	45	107	81	36	37	37	18	45	45	81	69	71	71	9
	T0	122	137	64	45	48	42	9	169	123	66	42	45	45	18	147			7	8	8	21	69	157	60	45	50	51	12
	T4	41	80	75	62	66	66	12	165	53	79	63	64	65	18
ARDS51-26	BLH	64	41	81	70	72	72	15	182	45	81	69	68	69	21	59	62	81	40	41	41	16	58	40	82	70	72	72	14
	T0	58	67	76	59	63	63	13	130	53	79	60	62	61	18	57	504	71	21	22	22	5	58	56	78	61	64	64	13
	T4	57	52	78	65	68	67	16	162	46	80	65	67	67	21	60	327	78	23	24	24	6	52	50	80	65	68	68	15
ARDS51-27	BLH	54	44	81	69	72	72	7	486	98	72	59	64	64	9	56	69	79	39	39	40	17	54	40	82	70	73	73	6
	T0	84	120	66	46	50	51	10	196	110	69	44	47	47	15	66	-	46	13	14	14	7	80	123	66	47	52	52	9
	T4	62	62	77	59	63	63	9	251	58	78	59	61	61	14	61	240	69	25	25	26	17	58	57	78	61	65	65	8
ARDS51-28	BLH	45	42	82	72	75	75	100								45	87	83	29	30	30	100	44	38	83	74	76	76	100
	T0	40	79	74	56	59	60	5	153	43	81	66	69	69	8	46	263	76	24	26	26	3	43	53	79	65	68	69	5
	T4	52	49	80	66	69	69	11	139	38	82	68	69	69	14	53	87	80	37	37	37	10	48	45	81	69	71	71	10
ARDS51-29	BLH	47	37	83	72	72	72	18	261	42	82	69	68	70	23	47	48	82	46	46	47	13	47	32	83	72	73	73	18
	T0	41	43	81	69	71	71	11	140	34	83	69	70	70	16	42	89	79	37	39	39	9	39	40	82	70	71	71	10
	T4	38	52	79	69	72	73	1	153	46	81	71	74	74	2	37	125	82	26	27	27	1	47	57	82	68	73	74	0
ARDS51-30	BLH
Animal Died	T0
	T4
ARDS51-31	BLH	51	42	82	71	73	73	11	181	38	83	72	73	73	15	51	58	81	40	40	41	11	49	37	83	73	75	74	11
	T0								232	61	77	58	61	61	17	61	653	57	20	20	20	19	57	68	76	55	59	59	14
	T4	55	70	76	60	63	64	11	164	51	79	62	64	64	16	54	313	69	24	27	28	4	51	63	77	62	66	66	11
