# Supplementary material for: Fluid resuscitation-related coagulation impairment in a porcine hemorrhagic shock model
Source: PeerJ. 2020 Feb 10;8:e8399. doi: 10.7717/peerj.8399 (PMC7017792; doi:10.7717/peerj.8399)
Supplement: Data S2 [file peerj-08-8399-s002.xlsx]

## Sheet: CT APTEM
HES	BLH	T0	T4		GP	BLH	T0	T4		BES	BLH	T0	T4
1	53	50			2	45	65	53		3	52	53	48
6	51	93	60		4	52	66	53		13	50	92	49
7	45	91	73		5	51	65	54		15	54	46	41
8	47	51	49		9	48	68	56		16	38	45	48
10	40	78	57		11	75	47	38		17	40		48
12	56	70	53		14	49	50	55		18	54	45	46
20	45	69			19	45	44			21	58	58	52
22	54	80	58		24	49	57	51		23	44	43	48
Mean	48.875	72.75	58.3333			51.75	57.75	51.4286			48.75	54.5714	47.5
STABW	5.49025	17.2019	9.15423			10.4312	10.351	6.71565			7.54668	18.1631	3.35942
HES	49 (5)	73 (17)	58 (9)
GP	52 (10)	58 (10)	51 (7)
BEL	49 (8)	55 (18)	48 (3)

## Sheet: CFT APTEM
HES	BLH	T0	T4		GP	BLH	T0	T4		BES	BLH	T0	T4
1	37	103			2	33	68	60		3	33	51	305
6	38	97	57		4	43	89	75		13	45	69	45
7	36	110	71		5	37	66	68		15	40	50	45
8	44	135	75		9	38	71	59		16	40	56	39
10	37	111	58		11	34	69	40		17	18		29
12	34	91	54		14	42	84	65		18	36	42	41
20	45	157			19	46	105			21	40	56	50
22	40	123	57		24	37	68	63		23	38	53	45
Mean	38.875	115.875	62		11	38.75	77.5	61.4286		15.75	36.25	53.8571	74.875
STABW	4.15188	23.2696	9.35414		6.03955	4.83046	14.4618	11.8898		5.73627	8.77496	8.9666	99.8105
HES	39 (4)	116 (23)	62 (9)
GP	39 (5)	78 (14)	61 (12)
BEL	36 (9)	54 (9)	75 (100)

## Sheet: Alpha APTEM
HES	BLH	T0	T4		GP	BLH	T0	T4		BES	BLH	T0	T4
1	82	69	-		2	83	76	78		3	84	80	76
6	82	70	78		4	81	72	75		13	81	76	81
7	83	68	76		5	83	76	77		15	82	80	81
8	81	64	75		9	83	76	78		16	82	79	82
10	83	68	78		11	85	76	82		17	86	-	84
12	83	72	79		14	81	73	77		18	83	82	82
20	81	60	-		19	81	69	-		21	82	78	80
22	82	66	78		24	83	76	77		23	83	79	81
Mean	82.125	67.125	77.3333		11	82.5	74.25	77.7143		15.75	82.875	79.1429	80.875
STABW	0.899735	4.02965	1.64317		6.03955	1.51186	2.76887	2.31661		5.73627	1.67616	2.04124	2.47848
HES	82 (1)	67 (4)	77 (2)
GP	83 (2)	74 (3)	78 (2)
BEL	83 (2)	79 (2)	81 (2)

## Sheet: A10
HES	BLH	T0	T4		GP	BLH	T0	T4		BES	BLH	T0	T4
1	71	52	-		2	70	53	60		3	74	63	24
6	72	47	63		4	70	51	58		13	67	60	64
7	73	50	61		5	74	57	63		15	75	68	72
8	67	45	58		9	71	53	60		16	74	66	71
10	71	47	63		11	50	60	74		17	84	-	78
12	75	54	66		14	71	55	64		18	77	71	74
20	69	45	-		19	74	51	-		21	70	61	65
22	70	47	61		24	73	55	62		23	74	65	69
Mean	71	48.375	62		11	69.125	54.375	63		15.75	74.375	64.8571	64.625
STABW	2.60951	3.5051	2.94958		6.03955	8.36375	3.30224	5.74166		5.73627	5.38074	4.26224	18.303
HES	71 (3)	48 (4)	62 (3)
GP	69 (8)	54 (3)	63 (6)
BEL	74 (5)	65 (4)	65 (18)

## Sheet: A20
HES	BLH	T0	T4		GP	BLH	T0	T4		BES	BLH	T0	T4
1	73	56	-		2	71	56	63		3	74	66	26
6	73	50	66		4	72	55	61		13	69	65	67
7	75	55	66		5	76	60	66		15	77	71	75
8	69	48	62		9	71	56	63		16	76	67	73
10	73	51	65		11	51	64	76		17	85	-	79
12	76	59	69		14	74	59	68		18	79	74	76
20	71	50			19	77	55	-		21	72	64	68
22	73	52	65		24	75	59	66		23	76	68	71
Mean	72.875	52.625	65.5		11	70.875	58	66.1429		15.75	76	67.8571	66.875
STABW	2.34013	3.98808	2.50998		6.03955	8.82637	3.33809	5.4191		5.73627	5.16398	3.86868	18.2731
HES	73 (2)	53 (4)	66 (3)
GP	71 (9)	58 (3)	66 (5)
BEL	76 (5)	68 (4)	67 (18)

## Sheet: McF
HES	BLH	T0	T4		GP	BLH	T0	T4		BES	BLH	T0	T4
1	73	56	-		2	71	56	63		3	75	66	27
6	73	51	66		4	72	55	61		13	69	65	67
7	75	55	66		5	76	61	66		15	77	72	75
8	69	48	62		9	72	56	63		16	76	57	73
10	72	51	65		11	51	64	76		17	85	-	82
12	76	59	69		14	74	59	68		18	79	75	77
20	71	51	-		19	77	55	-		21	72	64	68
22	73	52	65		24	74	59	66		23	76	69	71
Mean	72.75	52.875	65.5		11	70.875	58.125	66.1429		15.75	76.125	66.8571	67.5
STABW	2.36039	3.78594	2.50998		6.03955	8.84792	3.4641	5.4191		5.73627	5.11301	6.34823	18.3757
HES	73 (2)	53 (4)	66 (3)
GP	71 (9)	58 (3)	66 (5)
BEL	76 (5)	67 (6)	68 (18)

## Sheet: ML
HES	BLH	T0	T4		GP	BLH	T0	T4		BES	BLH	T0	T4
1	15	16	-		2	12	5	15		3	12	12	2
6	9	6	10		4	15	19	16		13	14	12	16
7	7	10	8		5	7	13	14		15	8	4	7
8	15	19	7		9	11	15	13		16	9	6	15
10	16	19	18		11	8	12	11		17	11	-	18
12	6	9	6		14	9	12	7		18	7	6	100
20	9	12	-		19	8	13	-		21	14	13	15
22	6	9	8		24	11	14	11		23	-	5	10
Mean	10.375	12.5	9.5		11	10.125	12.875	12.4286		15.75	10.7143	8.28571	22.875
STABW	4.20317	5.09902	4.81664		6.03955	2.82843	4.19183	3.26599		5.73627	2.81154	3.92003	33.6834
HES	10 (4)	13 (5)	10 (5)
GP	10 (3)	13 (4)	12 (3)
BEL	11 (3)	8 (4)	23 (34)

## Sheet: Refernce values APTEM
	CT	CFT	alpha	A10	A20	MCF	ML
	53	37	82	71	73	73	15
	51	38	82	72	73	73	9
	45	36	83	73	75	75	7
	47	44	81	67	69	69	15
	40	37	83	71	73	72	16
	56	34	83	75	76	76	6
	45	45	81	69	71	71	9
	54	40	82	70	73	73	6
	45	33	83	70	71	71	12
	52	43	81	70	72	72	15
	51	37	83	74	76	76	7
	48	38	83	71	71	72	11
	75	34	85	50	51	51	8
	49	42	81	71	74	74	9
	45	46	81	74	77	77	8
	49	37	83	73	75	74	11
	52	33	84	74	74	75	12
	50	45	81	67	69	69	14
	54	40	82	75	77	77	8
	38	40	82	74	76	76	9
	40	18	86	84	85	85	11
	54	36	83	77	79	79	7
	58	40	82	70	72	72	14
	44	38	83	74	76	76	-
MEAN	49.6522	38	82.5217	71.5217	73.2609	73.2609	10.1818
STABW	7.61344	5.83095	1.30974	5.89969	5.97888	5.97128	3.11121
Number	24	25	26	27	28	29	30
	50 (7)	51 (7)	52 (7)	53 (7)	54 (7)	55 (7)	56 (7)
RANGE	75-38	46-18	86-81	84-50	85-51	85-51	16-6
Z-values	1.96	2.96	3.96	4.96	5.96	6.96	7.96
ERROR	3.04601	2.33287	0.524005	2.36037	2.39205	2.38901	1.24474
upper	52.6982	40.3329	83.0457	73.8821	75.6529	75.6499	11.4266
lower	46.6062	35.6671	81.9977	69.1614	70.8688	70.8719	8.93707
	47-53	36-40	82-83	69-74	71-76	71-76	9-11
MAX	75	46	86	84	85	85	16
MIN	38	18	81	50	51	51	6
Range	38-75	18-46	81-86	50-84	51-85	51-85	6-16
