# Supplementary material for: Fluid resuscitation-related coagulation impairment in a porcine hemorrhagic shock model
Source: PeerJ. 2020 Feb 10;8:e8399. doi: 10.7717/peerj.8399 (PMC7017792; doi:10.7717/peerj.8399)
Supplement: Data S3 [file peerj-08-8399-s003.xlsx]

## Sheet: CT EXTEM
HES	BLH	T0	T4		GP	BLH	T0	T4		BES	BLH	T0	T4
1	54	14	14		2	51	67	61		3	51	53	52
6	--	89	61		4	52	61	53		13	50	45	55
7	50	94	71		5	77	68	69		15	51	51	52
8	52	70	61		9	77	44	52		16	42	52	52
10	43	86	54		11	52	52	40		17	49	48	52
12	47	83	59		14	51	66	64		18	46	49	-
20	27	122	41		19	13	89	-		21	64	58	57
22	54	84	62		24	51	-	55		23	45	40	52
Mean	46.7143	80.25	52.875		11	53	63.8571	56.2857		15.75	49.75	49.5	53.1429
STABW	9.85393	33.0188	18.8844		6.03955	21.4532	14.1825	10.3682		5.73627	6.80336	4.14039	2.16025
HES	47 (10)	80 (33)	53 (19)
GP	53 (21)	64 (14)	56 (10)
BEL	50 (7)	50 (4)	53 (2)

## Sheet: CFT EXTEM
HES	BLH	T0	T4		GP	BLH	T0	T4		BES	BLH	T0	T4
1	48	100	38		2	38	67	55		3	34	45	44
6	80	104	60		4	42	81	76		13	41	68	52
7	36	104	75		5	42	81	76		15	40	56	48
8	45	109	82		9	41	73	64		16	40	55	41
10	37	103	62		11	30	82	60		17	21	30	27
12	35	90	53		14	30	69	27		18	35	43	-
20	68	137	80		19	38	84	63		21	41	67	52
22	44	120	62		24	42	-	70		23	-	79	49
Mean	49.125	108.375	64		11	37.875	76.7143	61.375		15.75	36	55.375	44.7143
STABW	17.5255	14.5798	15.903		6.03955	5.25085	6.8972	16.5874		5.73627	7.2111	13.6626	9.40213
HES	49 (18)	108 (15)	64 (16)
GP	38 (5)	77 (7)	61 (17)
BEL	36 (7)	55 (14)	45 (9)

## Sheet: Alpha extem
HES	BLH	T0	T4		GP	BLH	T0	T4		BES	BLH	T0	T4
1	80	79	86		2	82	76	79		3	83	81	81
6	75	69	78		4	82	73	75		13	82	76	79
7	83	69	75		5	82	75	77		15	82	79	80
8	81	68	73		9	84	73	78		16	82	79	82
10	82	69	78		11	84	76	85		17	86	84	85
12	83	72	79		14	82	73	77		18	83	81	-
20	78	64	75		19	76	72	-		21	81	76	78
22	81	66	77		24	82	-	76		23	82	74	80
Mean	80.375	69.5	77.625		11	81.75	74	78.1429		15.75	82.625	78.75	80.7143
STABW	2.9277	4.6188	4.2314		6.03955	2.69037	1.63299	3.44964		5.73627	1.60357	2.87849	2.48328
HES	80 (3)	70 (5)	78 (4)
GP	82 (3)	74 (2)	78 (3)
BEL	83 (2)	79 (3)	81 (2)

## Sheet: A10
HES	BLH	T0	T4		GP	BLH	T0	T4		BES	BLH	T0	T4
1	66	52	49		2	69	53	61		3	75	66	72
6	65	47	64		4	71	53	57		13	68	58	61
7	73	51	63		5	74	58	62		15	74	66	70
8	67	47	56		9	74	54	62		16	76	63	70
10	70	48	63		11	78	62	57		17	83	79	79
12	76	54	65		14	73	54	65		18	77	71	-
20	68	45	62		19	71	48	-		21	70	59	65
22	69	46	59		24	71	-	60		23	72	56	66
Mean	69.25	48.75	60.125		11	72.625	54.5714	60.5714		15.75	74.375	64.75	69
STABW	3.98808	3.23669	5.76525		6.03955	2.91139	4.39155	3.14113		5.73627	4.88925	7.25718	6.1563
HES	69 (4)	49 (3)	60 (6)
GP	73 (3)	55 (4)	61 (3)
BEL	74 (5)	65 (7)	69 (6)

## Sheet: A20
Vololyte	BLH	T0	T4		Gelafundin	BLH	T0	T4		Sterofundin	BLH	T0	T4
1	69	57	55		2	70	55	63		3	76	68	74
6	68	51	67		4	72	57	60		13	70	62	65
7	74	56	67		5	75	61	66		15	77	70	73
8	68	50	60		9	75	58	65		16	78	66	72
10	71	51	65		11	79	62	57		17	84	80	80
12	78	58	69		14	75	58	69		18	79	74	-
20	72	48	66		19	74	52	-		21	72	63	68
22	72	50	63		24	73	-	63		23	75	59	69
Mean	71.5	52.625	64		11	74.125	57.5714	63.2857		15.75	76.375	67.75	71.5714
STABW	3.64496	3.91578	4.91354		6.03955	2.81154	3.40867	4.32049		5.73627	4.61364	6.35085	5.17687
HES	72 (4)	53 (4)	64 (5)
GP	74 (3)	58 (3)	63 (4)
BEL	76 (5)	68 (6)	72 (5)

## Sheet: McF
HES	BLH	T0	T4		GP	BLH	T0	T4		BES	BLH	T0	T4
1	69	57	55		2	70	55	63		3	76	68	74
6	68	51	67		4	72	57	60		13	70	62	65
7	74	57	67		5	75	61	66		15	77	70	73
8	68	50	60		9	75	58	65		16	78	66	72
10	71	51	65		11	79	65	57		17	84	80	80
12	78	59	69		14	75	59	69		18	79	74	-
20	71	42	66		19	74	53	-		21	72	63	67
22	72	51	63		24	73	-	64		23	75	60	69
Mean	71.375	52.25	64		11	74.125	58.2857	63.4286		15.75	76.375	67.875	71.4286
STABW	3.63842	5.82687	4.91354		6.03955	2.81154	3.94606	4.32049		5.73627	4.61364	6.35085	5.34478
HES	71 (4)	52 (6)	64 (5)
GP	74 (3)	58 (4)	63 (4)
BEL	76 (5)	68 (6)	71 (5)

## Sheet: ML
HES	BLH	T0	T4		GP	BLH	T0	T4		BES	BLH	T0	T4
1	16	15	2		2	13	6	15		3	11	11	11
6	14	6	11		4	15	21	16		13	14	16	17
7	10	11	9		5	9	14	15		15	8	5	8
8	12	18	17		9	12	13	12		16	9	12	13
10	16	20	18		11	8	12	0		17	12	11	14
12	4	9	6		14	8	11	7		18	5	6	-
20	11	9	12		19	8	15	-		21	15	13	16
22	7	10	9		24	11	-	11		23	100	5	11
Mean	11.25	12.25	10.5		11	10.5	13.1429	10.8571		15.75	21.75	9.875	12.8571
STABW	4.18045	5.19157	5.70714		6.03955	2.87849	4.52506	6.24233		5.73627	3.5051	3.86683	3.3116
HES	11 (4)	12 (5)	11 (6)
GP	11 (3)	13 (5)	11 (6)
BEL	22 (4)	10 (4)	13 (3)

## Sheet: Reference valuesEXTEM
	CT	CFT	alpha	A10	A20	MCF	ML
	54	48	80	66	69	69	16
	--	80	75	65	68	68	14
	50	36	83	73	74	74	10
	52	45	81	67	68	68	12
	43	37	82	70	71	71	16
	47	35	83	76	78	78	4
	27	68	78	68	72	71	11
	54	44	81	69	72	72	7
	51	38	82	69	70	70	13
	52	42	82	71	72	72	15
	77	42	82	74	75	75	9
	77	41	84	74	75	75	12
	52	30	84	78	79	79	8
	51	30	82	73	75	75	8
	13	38	76	71	74	74	8
	51	42	82	71	73	73	11
	51	34	83	75	76	76	11
	50	41	82	68	70	70	14
	51	40	82	74	77	77	8
	42	40	82	76	78	78	9
	49	21	86	83	84	84	12
	46	35	83	77	79	79	5
	64	41	81	70	72	72	15
	45	-	82	72	75	75	-
MEAN	49.9565	41.2174	81.5833	72.0833	74	73.9583	10.7826
STABW	13.0818	11.9657	2.39414	4.21092	3.92318	3.95055	3.38387
Number	24	24	24	24	24	24	24
	50 (7)	51 (7)	52 (7)	53 (7)	54 (7)	55 (7)	56 (7)
RANGE	77-13	80-21	86-75	83-65	84-68	84-68	16-4
Z-values	1.96	1.96	1.96	1.96	1.96	1.96	1.96
ERROR	5.23382	4.78728	0.957854	1.68472	1.5696	1.58055	1.35383
upper	55.1903	46.0047	82.5412	73.7681	75.5696	75.5389	12.1364
lower	44.7227	36.4301	80.6255	70.3986	72.4304	72.3778	9.42878
	45-55	36-46	81-83	70-74	72-76	72-76	9-12
MAX	77	80	86	83	84	84	16
MIN	13	21	75	65	68	68	4
Range	13-77	21-80	75-86	65-83	68-84	68-84	4-16
