# Supplementary material for: Fluid resuscitation-related coagulation impairment in a porcine hemorrhagic shock model
Source: PeerJ. 2020 Feb 10;8:e8399. doi: 10.7717/peerj.8399 (PMC7017792; doi:10.7717/peerj.8399)
Supplement: Data S4 [file peerj-08-8399-s004.xlsx]

## Sheet: CT FIBm
HES	BLH	T0	T4		GP	BLH	T0	T4		BES	BLH	T0	T4
1	55	30	-		2	116	70	62		3	62	55	43
6	57	130	70		4	57	129	71		13	56	50	46
7	50	535	72		5	59	57	67		15	66	57	54
8	57	101	64		9	58	76	65		16	42	51	52
10	46	173	67		11	43	32	45		17	54	-	58
12	47	268	56		14	54	23	89		18	46	52	53
20	45	147	-		19	66	202	-		21	59	57	60
22	56	66	61		24	51	61	54		23	45	46	53
Mean	51.625	181.25	65		11	63	81.25	64.7143		15.75	53.75	52.5714	52.375
STABW	5.25991	165.303	6.26099		6.03955	23.6482	62.4004	14.2232		5.73627	8.544	3.07679	6.07493
HES	52 (5)	181 (165)	65 (6)
GP	63 (24)	81 (62)	65 (14)
BEL	54 (9)	53 (3)	52 (6)

## Sheet: CFT FIB
HES	BLH	T0	T4		GP	BLH	T0	T4		BES	BLH	T0	T4
1	40	51			2	267	535	139		3	52	146	38
6	117	-	-		4	128	-	-		13	114	223	384
7	74	-	-		5	64	-	-		15	200	-	411
8	135	-	-		9	69	-	534		16	67	-	268
10	68	-	364		11	26	-	188		17	21	-	35
12	53	-	391		14	85	-	455		18	47	274	154
20	107	-	-		19	-	-	-		21	62	504	327
22	69	-	240		24	58	653	313		23	-	263	87
Mean	82.875	51	331.667		11	99.5714	594	325.8		15.75	80.4286	282	213
STABW	35.2771	-	19.0919		6.03955	85.2965	-	194.835		5.73627	59.724	154.094	157.05
HES	83 (35)	-	332 (19)
GP	100 (85)	-	326 (195)
BEL	80 (60)	282 (154)	213 (157)

## Sheet: Alpha FIB
HES	BLH	T0	T4		GP	BLH	T0	T4		BES	BLH	T0	T4
1	82	82	-		2	-	42	69		3	79	73	83
6	75	-	61		4	78	-	-		13	81	68	54
7	80	-	48		5	81	56	61		15	74	46	75
8	76	-	-		9	79	-	-		16	80	67	77
10	81	-	55		11	85	62	74		17	86	-	84
12	81	18	57		14	79	17	-		18	82	74	78
20	81	-	-		19	68	-	-		21	81	71	78
22	79	46	69		24	81	57	69		23	83	76	80
Mean	79.375	48.6667	58		11	78.7143	46.8	68.25		15.75	80.75	67.8571	76.125
STABW	2.76026	45.2548	5.43906		6.03955	5.64506	20.0062	6.55744		5.73627	3.59894	10.4067	10.0475
HES	79 (3)	49 (45)	58 (5)
GP	79 (6)	47 (20)	68 (7)
BEL	81 (4)	68 (10)	76 (10)

## Sheet: A10
HES	BLH	T0	T4		GP	BLH	T0	T4		BES	BLH	T0	T4
1	55	30	-		2	116	70	62		3	62	55	43
6	57	130	70		4	57	129	71		13	56	50	46
7	50	535	72		5	59	57	67		15	66	57	54
8	57	101	64		9	58	76	65		16	42	51	52
10	46	173	67		11	43	32	45		17	54	-	58
12	47	268	56		14	54	23	89		18	46	52	53
20	45	147	-		19	66	202	-		21	59	57	60
22	56	66	61		24	51	61	54		23	45	46	53
Mean	51.625	181.25	65		11	63	81.25	64.7143		15.75	53.75	52.5714	52.375
STABW	5.25991	165.303	6.26099		6.03955	23.6482	62.4004	14.2232		5.73627	8.544	3.07679	6.07493
HES	52 (5)	181 (165)	65 (6)
GP	63 (24)	81 (62)	65 (14)
BEL	54 (9)	53 (3)	52 (6)

## Sheet: A20
HES	BLH	T0	T4		GP	BLH	T0	T4		BES	BLH	T0	T4
1	53	31	-		2	36	22	36		3	56	32	77
6	32	15	18		4	36	9	18		13	36	36	23
7	34	3	12		5	40	18	19		15	27	18	21
8	31	11	11		9	39	13	21		16	46	18	26
10	44	8	23		11	56	18	28		17	65	-	53
12	44	7	21		14	41	14	32		18	53	24	25
20	37	8	-		19	17	4	-		21	41	22	24
22	39	14	25		24	40	20	27		23	30	26	37
Mean	39.25	12.125	18.3333		11	38.125	14.75	25.8571		15.75	44.25	25.1429	35.75
STABW	8.03563	9.20921	5.33854		6.03955	11.4518	6.08276	7.44759		5.73627	12.8804	7.45654	21.3218
HES	39 (8)	12 (9)	18 (5)
GP	38 (11)	15 (6)	26 (7)
BEL	44 (13)	25 (7)	36 (21)

## Sheet: McF
HES	BLH	T0	T4		GP	BLH	T0	T4		BES	BLH	T0	T4
1	53	31	-		2	37	22	40		3	56	23	77
6	33	15	19		4	36	9	18		13	36	36	23
7	36	3	12		5	40	18	19		15	28	18	22
8	31	11	11		9	40	14	21		16	47	19	26
10	45	8	23		11	56	19	28		17	65	-	53
12	45	11	23		14	42	4	23		18	53	24	26
20	37	8	-		19	17	8	-		21	41	22	24
22	40	14	26		24	41	20	28		23	30	26	37
Mean	40	12.625	19		11	38.625	14.25	25.2857		15.75	44.5	24	36
STABW	7.89515	8.97881	5.81378		6.03955	11.4995	6.62966	8.23205		5.73627	12.634	6.47045	21.13
HES	40 (8)	13 (9)	19 (6)
GP	39 (11)	14 (7)	25 (8)
BEL	45 (13)	24 (6)	36 (21)

## Sheet: ML
HES	BLH	T0	T4		GP	BLH	T0	T4		BES	BLH	T0	T4
1	6	0	-		2	7	5	7		3	8	18	9
6	14	7	11		4	15	27	22		13	12	3	18
7	10	2	0		5	8	8	18		15	13	13	10
8	15	23	4		9	12	26	21		16	3	12	7
10	16	29	24		11	2	15	16		17	6	-	8
12	12	63	31		14	8	100	20		18	9	8	100
20	18	21	-		19	15	70	-		21	16	5	6
22	17	7	17		24	11	19	4		23	100	3	10
Mean	13.5	19	14.5		11	9.75	33.75	15.4286		15.75	20.875	8.85714	21
STABW	4.04145	21.7157	13.1719		6.03955	4.72077	35.6344	5.50151		5.73627	4.42934	5.56477	34.3698
HES	14 (4)	19 (22)	15 (13)
GP	10 (5)	34 (36)	15 (6)
BEL	21 (4)	9 (6)	21 (34)

## Sheet: Reference values FIBTEM
	CT	CFT	alpha	A10	A20	MCF	ML
	55	40	82	55	53	53	6
	57	117	75	57	32	33	14
	50	74	80	50	34	36	10
	57	135	76	57	31	31	15
	46	68	81	46	44	45	16
	47	53	81	47	44	45	12
	45	107	81	45	37	37	18
	56	69	79	56	39	40	17
	116	267	-	116	36	37	7
	57	128	78	57	36	36	15
	59	64	81	59	40	40	8
	58	69	79	58	39	40	12
	43	26	85	43	56	56	2
	54	85	79	54	41	42	8
	66	0	68	66	17	17	15
	51	58	81	51	40	41	11
	62	52	79	62	56	56	8
	56	114	81	56	36	36	12
	66	200	74	66	27	28	13
	42	67	80	42	46	47	3
	54	21	86	54	65	65	6
	46	47	82	46	53	53	9
	59	62	81	59	41	41	16
	45	-	83	45	30	30	-
MEAN	56.125	83.6087	79.6522	56.125	40.5417	41.0417	11
STABW	14.4743	58.9034	3.76115	14.4743	10.5829	10.4735	4.48229
Number	24	24	24	24	24	24	24
	50 (7)	51 (7)	52 (7)	53 (7)	54 (7)	55 (7)	56 (7)
RANGE	116-42	267-0	86-68	116-42	65-17	65-17	18-2
Z-values	1.96	1.96	1.96	1.96	1.96	1.96	1.96
ERROR	5.79093	23.5663	1.50477	5.79093	4.23405	4.19027	1.79329
upper	61.9159	107.175	81.1569	61.9159	44.7757	45.2319	12.7933
lower	50.3341	60.0424	78.1474	50.3341	36.3076	36.8514	9.20671
	50-62	60-107	78-81	50-62	36-45	37-45	9-13
MAX	116	267	86	116	65	65	18
MIN	42	0	68	42	17	17	2
Range	42-116	0-267	68-86	42-116	17-65	17-65	2-18
