# Supplementary material for: Fluid resuscitation-related coagulation impairment in a porcine hemorrhagic shock model
Source: PeerJ. 2020 Feb 10;8:e8399. doi: 10.7717/peerj.8399 (PMC7017792; doi:10.7717/peerj.8399)
Supplement: Data S5 [file peerj-08-8399-s005.xlsx]

## Sheet: CT Inem
HES	BLH	T0	T4		GP	BLH	T0	T4		BES	BLH	T0	T4
1	159	163	-		2	202	122	143		3	161	160	143
6	130	195	177		4	169	230	152		13	196	220	288
7	246	214	287		5	183	226	223		15	126	122	161
8	148	174	152		9	151	139	185		16	135	142	200
10	161	-	171		11	180	166	193		17	131	-	152
12	181	279	403		14	170	138	239		18	142	139	161
20	146	169	165		19	128	176	-		21	182	130	162
22	486	196	251		24	181	232	164		23	-	153	139
Mean	207.125	198.571	229.429		11	170.5	178.625	185.571		15.75	153.286	152.286	175.75
STABW	38.0951	43.5017	99.6723		6.03955	23.8467	42.9535	37.8757		5.73627	27.1153	35.6113	50.4249
HES	207 (38)	199 (44)	229 (100)
GP	171 (24)	179 (43)	186 (38)
BEL	153 (27)	152 (36)	176 (50)

## Sheet: CFT INTEM
HES	BLH	T0	T4		GP	BLH	T0	T4		BES	BLH	T0	T4
1	38	77	-		2	45	57	45		3	55	36	34
6	31	92	46		4	39	70	55		13	36	70	110
7	51	88	65		5	37	64	55		15	-	35	39
8	39	97	62		9	34	63	45		16	90	38	37
10	32	-	47		11	29	40	48		17	22	-	27
12	39	102	102		14	54	72	69		18	31	36	34
20	35	123	53		19	35	67	-		21	45	53	46
22	98	110	58		24	38	61	51		23	-	43	38
Mean	45.375	98.4286	61.8571		11	38.875	61.75	52.5714		15.75	46.5	44.4286	45.625
STABW	6.64401	15.5274	20.8303		6.03955	8.22598	10.8233	9.13053		5.73627	24.1557	14.1374	28.4939
HES	45 (7)	98 (16)	62 (21)
GP	39 (8)	62 (11)	53 (9)
BEL	47 (24)	44 (14)	46 (28)

## Sheet: Alpha INtem
HES	BLH	T0	T4		GP	BLH	T0	T4		BES	BLH	T0	T4
1	82	74	-		2	81	78	81		3	79	83	83
6	84	71	81		4	82	76	79		13	82	76	70
7	80	72	77		5	83	77	79		15	81	83	82
8	82	71	77		9	83	77	81		16	77	82	83
10	83	-	80		11	84	82	80		17	86	-	85
12	83	69	70		14	80	75	76		18	84	83	83
20	83	66	79		19	83	77	-		21	81	79	80
22	72	69	78		24	83	77	79		23	-	81	82
Mean	81.125	70.2857	77.4286		11	82.375	77.375	79.2857		15.75	81.4286	81	81
STABW	1.27242	2.73861	3.93277		6.03955	1.38013	2.22539	1.8619		5.73627	2.99205	2.89828	5.01427
HES	81 (1)	70 (3)	77 (4)
GP	82 (1)	77 (2)	79 (2)
BEL	81 (3)	81 (3)	81 (5)

## Sheet: A10
HES	BLH	T0	T4		GP	BLH	T0	T4		BES	BLH	T0	T4
1	68	50	-		2	69	54	59		3	57	66	70
6	71	45	63		4	69	52	57		13	65	55	56
7	68	49	59		5	72	55	59		15	68	67	70
8	66	44	55		9	71	54	63		16	74	66	70
10	70	-	61		11	76	60	66		17	81	-	76
12	73	47	59		14	70	56	62		18	78	72	73
20	68	42	63		19	72	52	-		21	69	60	65
22	59	44	59		24	72	58	62		23	-	66	68
Mean	67.875	45.8571	59.8571		11	71.375	55.125	61.1429		15.75	70.2857	64.5714	68.5
STABW	2.34013	3.0605	3.03315		6.03955	2.42997	2.75162	3.28634		5.73627	8.15913	5.95539	6.47707
HES	68 (2)	46 (3)	60 (3)
GP	71 (2)	55 (3)	61 (3)
BEL	70 (8)	65 (6)	69 (6)

## Sheet: A20
HES	BLH	T0	T4		GP	BLH	T0	T4		BES	BLH	T0	T4
1	69	52	-		2	70	56	60		3	56	68	72
6	71	48	64		4	70	55	58		13	67	58	61
7	70	53	63		5	73	59	61		15	71	69	71
8	66	45	56		9	70	56	64		16	76	68	71
10	70	-	60		11	76	63	67		17	81	-	76
12	74	50	62		14	71	59	65		18	79	74	74
20	68	45	64		19	72	56	-		21	68	62	67
22	64	47	61		24	73	61	64		23	-	69	69
Mean	69	48.5714	61.4286		11	71.875	58.125	62.7143		15.75	71.1429	66.8571	70.125
STABW	2.49762	3.43026	3.08221		6.03955	2.21467	2.81154	3.39116		5.73627	8.55236	5.64801	4.95696
HES	69 (2)	49 (3)	61 (3)
GP	72 (2)	58 (3)	63 (3)
BEL	71 (9)	67 (6)	70 (5)

## Sheet: McF
HES	BLH	T0	T4		GP	BLH	T0	T4		BES	BLH	T0	T4
1	70	52	-		2	70	56	60		3	57	53	72
6	71	47	64		4	70	55	59		13	67	59	61
7	70	53	63		5	73	58	61		15	-	69	58
8	67	45	56		9	71	56	65		16	76	69	71
10	70	-	61		11	77	63	67		17	81	-	77
12	74	51	62		14	71	59	65		18	79	74	74
20	69	45	65		19	73	57	-		21	69	61	67
22	64	47	61		24	73	61	64		23	-	69	69
Mean	69.375	48.5714	61.7143		11	72.25	58.125	63		15.75	71.5	64.8571	68.625
STABW	2.1157	3.60093	3.18852		6.03955	2.47848	2.69037	3.25064		5.73627	8.98332	7.80812	6.94879
HES	69 (2)	49 (4)	62 (3)
GP	72 (2)	58 (3)	63 (3)
BEL	72 (9)	65 (8)	69 (7)

## Sheet: ML
HES	BLH	T0	T4		GP	BLH	T0	T4		BES	BLH	T0	T4
1	20	22	-		2	16	9	19		3	21	13	15
6	14	10	15		4	20	22	20		13	20	21	23
7	14	16	14		5	13	18	19		15	-	11	8
8	19	20	21		9	16	19	18		16	13	17	17
10	20	-	21		11	13	17	19		17	18	-	19
12	10	13	13		14	15	16	13		18	10	11	-
20	15	18	18		19	16	21	-		21	21	18	21
22	9	15	14		24	15	17	16		23	-	8	14
Mean	15.125	16.2857	16.5714		11	15.5	17.375	17.7143		15.75	17.1667	14.1429	16.7143
STABW	3.78594	4.46094	3.52136		6.03955	2.37045	4.27618	2.52982		5.73627	4.62241	4.11906	5.30723
HES	15 (4)	16 (4)	17 (4)
GP	16 (2)	17 (4)	18 (3)
BEL	17 (5)	14 (4)	17 (5)

## Sheet: Reference values
	CT	CFT	alpha	A10	A20	MCF	ML
	159	38	82	68	69	70	20
	130	31	84	71	71	71	14
	246	51	80	68	70	70	14
	148	39	82	66	66	67	19
	161	32	83	70	70	70	20
	181	39	83	73	74	74	10
	146	35	83	68	68	69	15
	486	98	72	59	64	64	9
	202	45	81	69	70	70	16
	169	39	82	69	70	70	20
	183	37	83	72	73	73	13
	151	34	83	71	70	71	16
	180	29	84	76	76	77	13
	170	54	80	70	71	71	15
	128	35	83	72	72	73	16
	181	38	83	72	73	73	15
	161	55	79	57	56	57	21
	196	36	82	65	67	67	20
	126	-	81	68	71	-	-
	135	90	77	74	76	76	13
	131	22	86	81	81	81	18
	142	31	84	78	79	79	10
	182	45	81	69	68	69	21
	-	-	-	-	-	-	-
					-
MEAN	178	43.3182	81.6522	69.8261	70.6522	71	15.8182
STABW	72.9414	18.2662	2.83819	5.26267	5.09553	5.05211	3.6857
Number	24	24	24	24	24	24	24
	50 (7)	51 (7)	52 (7)	53 (7)	54 (7)	55 (7)	56 (7)
RANGE	486-126	98-22	86-72	81-57	81-56	81-57	21-9
Z-values	1.96	1.96	1.96	1.96	1.96	1.96	1.96
ERROR	29.1827	7.30802	1.13551	2.1055	2.03864	2.02126	1.47459
upper	207.183	50.6262	82.7877	71.9316	72.6908	73.0213	17.2928
lower	148.817	36.0102	80.5167	67.7206	68.6135	68.9787	14.3436
	149-207	36-51	81-83	68-72	69-73	69-73	14-17
MAX	486	98	86	81	81	81	21
MIN	126	22	72	57	56	57	9
Range	126-486	22-98	72-86	57-81	56-81	57-81	9-21
