# Supplementary material for: Fluid resuscitation-related coagulation impairment in a porcine hemorrhagic shock model
Source: PeerJ. 2020 Feb 10;8:e8399. doi: 10.7717/peerj.8399 (PMC7017792; doi:10.7717/peerj.8399)
Supplement: Data S6 [file peerj-08-8399-s006.xlsx]

## Sheet: Summary
Parameter		BLH	0h	4h
Mean (SD)
Fibrinogen	HES	388 (38)	88 (77)	244 (97)
	GP	409 (192)	157 (120)	261 (118)
	BES	436 (53)	311 (63)	332 (41)
APTT	HES	18,4 (1,8)	18,1 (2,5)	20,2 (1)
	GP	18,6 (7,5)	18,6 (1,3)	18,1 (7,5)
	BES	20,2 (2,2)	19,4 (1,4)	19,8 (1,6)
INR	HES	0,9 (0,1)	1,1 (0,1)	1,1 (0,1)
	GP	0,8 (0,3)	1,2 (0,1)	1 (0,4)
	BES	0,9 (0,1)	1 (0)	1 (0,1)
Quick	HES	121 (10)	84 (6)	95 (11)
	GP	98 (38)	79 (13)	75 (29)
	BES	118 (8)	193 (288)	103 (9)
Thrombocytes	HES	338 (94)	135 (40)	198 (46)
	GP	314 (137)	180 (47)	195 (83)
	BES	435 (159)	291 (98)	298 (100)
Haemoglobbin	HES	9,1 (0,9)	4,6 (0,7)	5,4 (0,8)
	GP	8,2 (3,2)	4,4 (0,7)	4,3 (1,7)
	BES	8,6 (0,8)	5,7 (0,6)	5,8 (0,4)

## Sheet: Fibrinogen
	HES	BLH	0h	4h		GP	BLH	0h	4h		BES	BLH	0h	4h
	51-02	364	-	-		51-03	348	45	238		51-04	474	372	282
	51-07	363	52	250		51-05	-	47	244		51-14	359	221	270
	51-08	401	214	246		51-06	526	259	323		51-17	407	293	340
	51-09	354	48	251		51-10	400	51	283		51-19	432	255	359
	51-11	379	49	314		51-12	719	379	457		51-22	538	418	360
	51-13	482	219	331		51-15	502	219	266		51-23	475	327	404
	51-25	374	50	264		51-24	346	43	-		51-26	395	-	325
	51-27	389	69	297		51-31	428	212	277		51-28	408	291	312

## Sheet: APTT
	HES	BLH	0h	4h		GP	BLH	0h	4h		BES	BLH	0h	4h
	51-02	18.6	-	-		51-03	28.4	18.5	20.1		51-04	18.7	22.3	20.4
	51-07	17.9	18.3	20.9		51-05	-	19.4	24.6		51-14	19.8	18.3	20.5
	51-08	21.4	16.6	20.2		51-06	20.9	20.2	26.3		51-17	19.3	20.2	20.9
	51-09	16.6	16.6	20.7		51-10	19.9	16.6	18		51-19	24.9	19.2	22.3
	51-11	18.4	17.8	20.4		51-12	19.4	16.6	17.6		51-22	21	19.1	20.1
	51-13	16.6	24.1	18.1		51-15	19.7	17.8	20.5		51-23	21.1	18.3	18.8
	51-25	16.6	16.6	19.6		51-24	19.9	20	-		51-26	16.6	-	16.6
	51-27	21.1	16.6	21.2		51-31	20.2	19.3	17.9		51-28	20.4	18.1	18.4

## Sheet: INR
	HES	BLH	0h	4h		GP	BLH	0h	4h		BES	BLH	0h	4h
	51-02	1	-	-		51-03	0.9	1.2	1.1		51-04	0.9	1.1	1
	51-07	0.9	1.1	1.1		51-05	0	1.3	1.1		51-14	0.9	1	1
	51-08	0.8	1.1	1.1		51-06	1	1.2	1.2		51-17	0.9	1	1
	51-09	0.9	1.1	1		51-10	0.9	1.1	1		51-19	0.8	1	0.9
	51-11	0.9	1.1	0.9		51-12	1	1	1		51-22	0.9	1	1.1
	51-13	0.8	1.1	1		51-15	0.9	1.1	1.2		51-23	0.9	1	1
	51-25	0.9	1.3	1.2		51-24	1	1.4	0		51-26	1	-	1
	51-27	0.9	1.1	1.1		51-31	1	1.3	1.3		51-28	0.9	1	1

## Sheet: Quick
	Volulyte	BLH	0h	4h		Gelafundin	BLH	0h	4h		Sterofundin	BLH	0h	4h
	51-02	101	-	-		51-03	125	76	89		51-04	117	83	96
	51-07	114	85	93		51-05	0	74	83		51-14	112	951	100
	51-08	131	87	91		51-06	104	80	82		51-17	111	100	102
	51-09	129	88	97		51-10	123	86	96		51-19	132	101	124
	51-11	125	91	114		51-12	108	105	96		51-22	116	104	91
	51-13	130	83	103		51-15	122	83	79		51-23	123	106	102
	51-25	116	72	74		51-24	104	60	0		51-26	106	-	108
	51-27	119	85	94		51-31	101	67	72		51-28	125	102	100

## Sheet: Thrombocytes
	HES	BLH	0h	4h		GP	BLH	0h	4h		BES	BLH	0h	4h
	51-02	335	165	211		51-03	277	214	235		51-04	352	267	239
	51-07	251	101	183		51-05	-	141	191		51-14	358	221	224
	51-08	341	136	180		51-06	287	175	180		51-17	404	282	282
	51-09	256	98	133		51-10	450	254	262		51-19	431	306	332
	51-11	467	174	271		51-12	456	218	261		51-22	819	509	539
	51-13	513	204	269		51-15	413	204	270		51-23	422	321	301
	51-25	262	87	182		51-24	342	115	-		51-26	237	140	192
	51-27	281	113	157		51-31	290	122	161		51-28	457	284	278

## Sheet: Haemoglobin
	HES	BLH	0h	4h		GP	BLH	0h	4h		BES	BLH	0h	4h
	51-02	8.3	4.8	5.3		51-03	9.6	3.8	5.2		51-04	8.5	5.6	5.2
	51-07	9	4.9	6		51-05	0	3.2	4		51-14	8.7	5.2	5.4
	51-08	9.2	4.9	5.5		51-06	9	4	4.3		51-17	8.8	6.2	6
	51-09	10.2	4.9	6		51-10	10.6	5	5.1		51-19	7.9	5.3	6.2
	51-11	8	3.4	4.2		51-12	9.1	5.6	5.6		51-22	7.5	5.3	5.6
	51-13	8.9	3.8	4.9		51-15	8.9	4.4	4.8		51-23	8.6	5.2	5.6
	51-25	8.5	4.3	4.6		51-24	8.6	4.4	0		51-26	10.4	6.6	6.3
	51-27	10.7	5.6	6.6		51-31	10.1	4.7	5.6		51-28	8.7	6.5	5.7
